# Supplementary material
Source: PubMed Central journal article supplement (PMC3230244)
Supplement: mp200270v_si_001.pdf [file mp200270v_si_001.pdf]

Figure S1

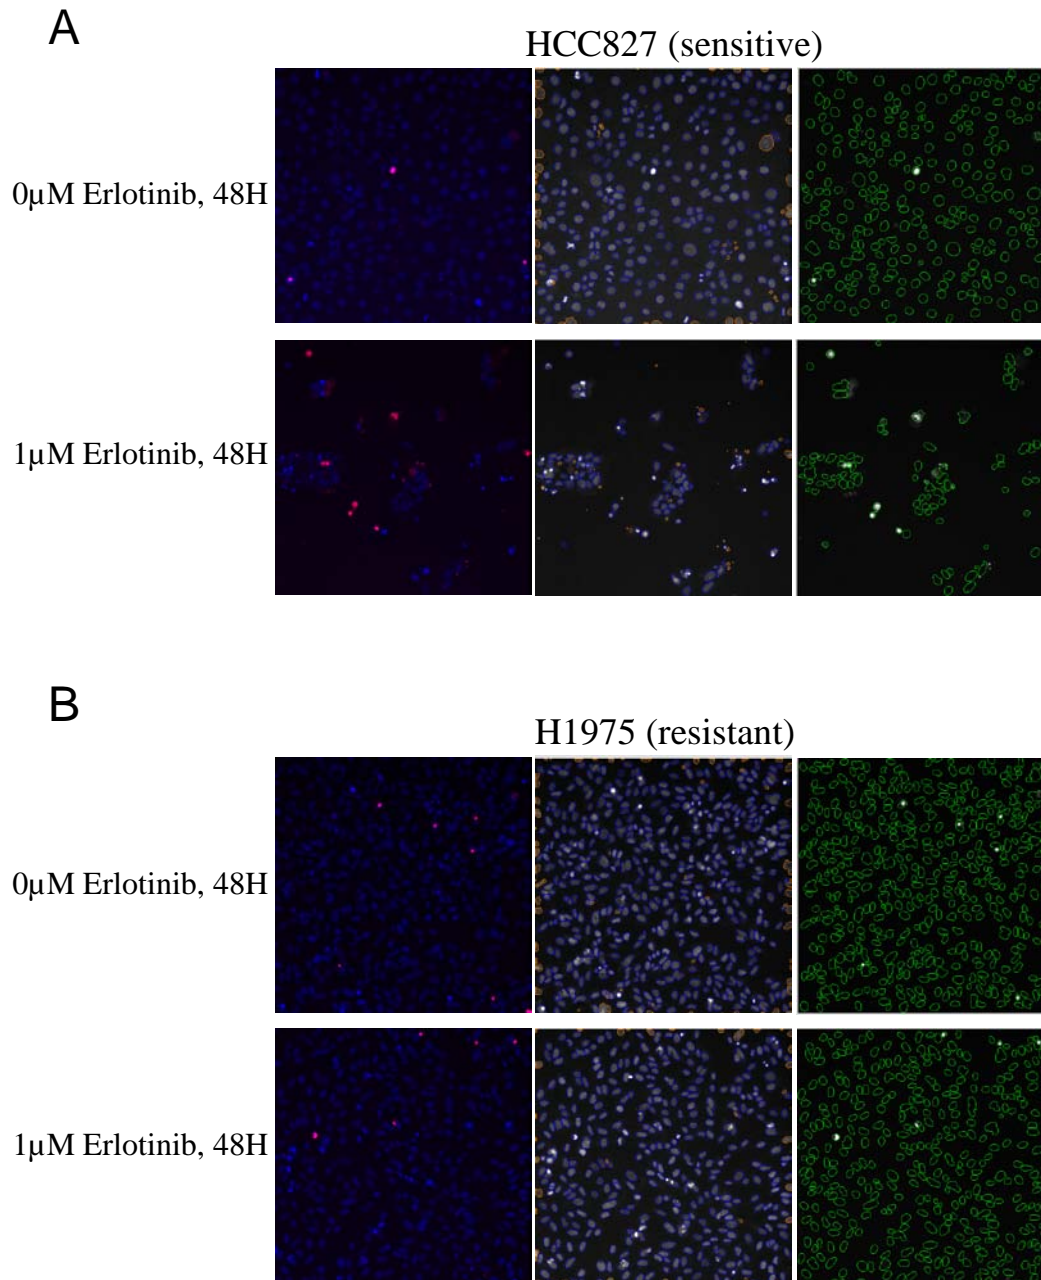

Figure S1. **Quantitative imaging of cells during drug treatments.** (a,b) HCC827 and H1975 were treated with varying concentrations of erlotinib and paclitaxel. Cells were stained with Hoechst 33342 and propidium iodide and imaged on the Cellomics ArrayScan to determine total cell count and number of dead cells, respectively. *Left panel*, composite images of cells stained with Hoechst 33342 and propidium iodide. *Middle panel*, total cell count is determined by the number cell nuclei present, which are outlined in blue; an orange outline represents those nuclei excluded from count based on size or border thresholds. *Right panel*, positive propidium iodide cells are determined by intensity of stain found within the green outline. Quantitative live and dead cell counts were determined from images captured from four entire wells of a 96-well plate per treatment condition (see Figure 1).
